# Supplementary material for: Using Stereolithographic Printing to Manufacture Monolithic Microfluidic Devices with an Extremely High Aspect Ratio
Source: MDPI journal article supplement (doi:10.3390/polym13213750), 2021-10-29
Supplement: s1 [file s1]

## Supplementary Materials

### **Using Stereolithographic Printing to Manufacture Monolithic Microfluidic Device with Extremely High Aspect Ratio**

Pin-Chuan Chen <sup>1,2</sup>, Po-Tsang Chen <sup>1</sup>, Tuan Ngoc Anh Vo <sup>1</sup>

<sup>1</sup>Department of Mechanical Engineering, National Taiwan University of Science and Technology, Taiwan.

<sup>2</sup>High Speed 3D Printing Research Center, National Taiwan University of Science and Technology, Taiwan.

\*Corresponding author: Prof. Pin-Chuan Chen

E-mail: [pcchen@mail.ntust.edu.tw](mailto:pcchen@mail.ntust.edu.tw) Phone: +88627376456. Fax: +88627376460

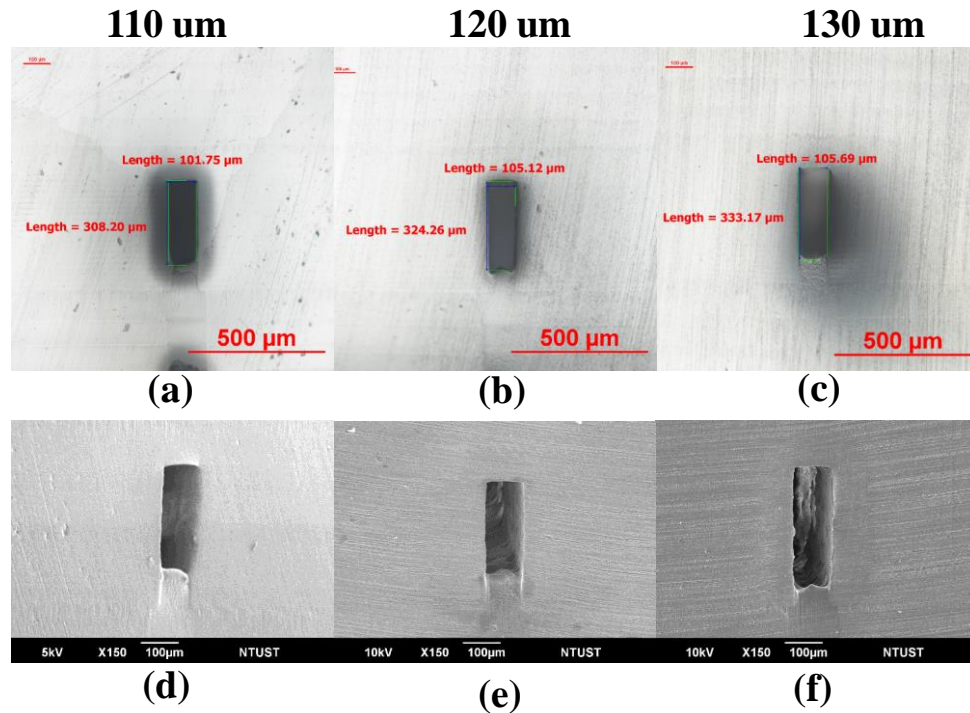

Figure S1: (a) to (c) cross sections with measurements obtained using a tool microscope; (d) to (f) SEM cross sections corresponding to printing thicknesses of 110 $\mu\text{m}$ , 120 $\mu\text{m}$ , and 130 $\mu\text{m}$ , respectively. After completion of the channel layer, the roof layer was printed continuously to seal the microchannel. The roof layer was applied in three printing thicknesses (110 $\mu\text{m}$ , 120 $\mu\text{m}$ , and 130 $\mu\text{m}$ ). The intended depth of the microchannel was 400  $\mu\text{m}$ ; however, the actual depth varied as a function of printing thickness, as follows: 308 $\mu\text{m}$  (printing thickness of 110 $\mu\text{m}$ ), 324 $\mu\text{m}$  (printing thickness of 120 $\mu\text{m}$ ), and 333 $\mu\text{m}$  (printing thickness of 130 $\mu\text{m}$ ).

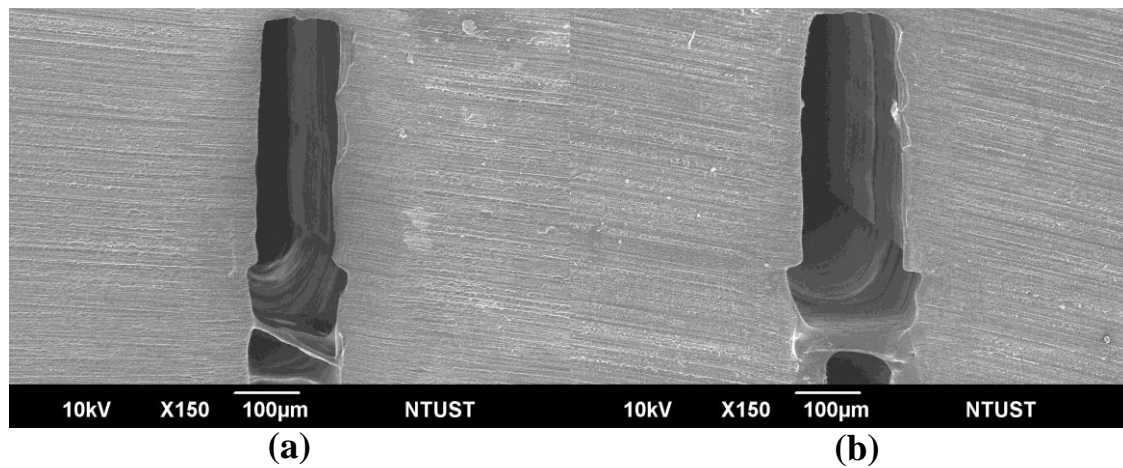

Figure S2: (a)(b) both figures showed the collapsed roof layer due to the reduced exposure energy (either reducing the lighting intensity or reducing the exposure time).
